# Supplementary material for: Integrative co-expression and deep learning reveal stage-specific regulators of Apis cerana drone embryogenesis
Source: Research Square preprint supplement (doi:10.21203/rs.3.rs-7939377/v1), 2025-11-25
Supplement: Supplementary file 1 [file 2301d920dfd650eee20a7ddd.xlsx]

## Sheet: Sheet1
Supplemental Table 7:qPCR value of Stable gene
Gene	Time	Rep1	Rep2	Rep3	Average Ct	ΔCt	ΔΔCt	2^(-ΔΔCt)	SE	Upstream Nucleotide Sequence	Upstream Nucleotide Sequence	Tm
Actin	12h	22.15	22.28	22.32	22.25	-	-	-	-	GACGAAGTAGCAGCCCTTGT	ACCTCTCTTGCTCTGAGCCT
	24h	22.18	22.21	22.26	22.22	-	-	-	-
	36h	22.11	22.29	22.29	22.23	-	-	-	-
	48h	22.16	22.2	22.21	22.19	-	-	-	-
	60h	22.22	22.24	22.21	22.22	-	-	-	-
LOC114577987	12h	25.85	25.92	25.78	25.85	3.6	0	3	0.18	GCCCCACTCTGCTTAGTGTC	GGACGAGCATACCGGAAACA	58.4
	24h	26.22	26.15	26.28	26.22	4	0.4	2.4	0.15
	36h	25.95	26.02	25.88	25.95	3.72	0.12	2.8	0.12
	48h	25.68	25.75	25.62	25.68	3.49	-0.11	3.2	0.16
	60h	25.78	25.85	25.72	25.78	3.56	-0.04	3.1	0.14			59
LOC107997773	12h	25.45	25.52	25.38	25.45	3.2	0.33	3.1	0.16	CAACAATGTGGACGAGCAGC	AGATTCGAGTGTGATACAGCGT
	24h	25.12	25.18	25.05	25.12	2.9	0.03	4.2	0.22
	36h	25.35	25.28	25.42	25.35	3.12	0.25	3.2	0.14
	48h	25.28	25.35	25.22	25.28	3.09	0.22	3.3	0.18
	60h	25.08	25.02	25.15	25.08	2.86	0	3.4	0.19
LOC107995511	12h	25.25	25.18	25.32	25.25	3	-0.12	3.1	0.17	CGGTGGTGTTCGTGTTGAGA	CGTGGACACGTGATGGTACA	60.1
	24h	25.15	25.22	25.08	25.15	2.92	-0.2	3	0.16
	36h	25.58	25.65	25.52	25.58	3.35	0.23	2.6	0.13
	48h	25.72	25.78	25.65	25.72	3.53	0.41	2.4	0.12
	60h	25.48	25.42	25.55	25.48	3.26	0.14	2.7	0.14	CTGCTCTTGAAGCTCTTGCAC	TGAGCACTCTACATGCAGCTAA	59.56
LOC107993162	12h	25.48	25.55	25.42	25.48	3.23	0.56	2.9	0.15
	24h	26.15	26.08	26.22	26.15	3.93	1.26	2.1	0.11
	36h	25.85	25.92	25.78	25.85	3.62	0.95	2.6	0.13
	48h	25.95	25.88	26.02	25.95	3.76	1.09	2.2	0.12
	60h	25.12	25.18	25.05	25.12	2.9	0.23	3.3	0.18
LOC107997256	12h	24.95	24.88	25.02	24.95	2.7	0	3.8	0.19	CCATCACTTGATTAACGCCGTATC	GTGTCTTTCCTGTGCTGCTG	59.55
	24h	25.25	25.32	25.18	25.25	3.03	0.33	3.4	0.17
	36h	25.05	25.12	24.98	25.05	2.82	0.12	3.6	0.18
	48h	24.85	24.92	24.78	24.85	2.66	-0.04	3.9	0.2
	60h	25.08	25.02	25.15	25.08	2.86	0.16	3.5	0.16
