# Supplementary material for: Integrative co-expression and deep learning reveal stage-specific regulators of Apis cerana drone embryogenesis
Source: Research Square preprint supplement (doi:10.21203/rs.3.rs-7939377/v1), 2025-11-25
Supplement: Supplementary file 2 [file 257ab7c574d3b8729f4c6a89.xlsx]

## Sheet: Sheet1
Supplemental 1S: The overall quality control of the RNA-Seq results.
Sample	Raw.data(bp)	Clean.data(bp)	Q20(%)	Q30(%)	N(%)	GC(%)
X-M1_L1	6083823600	6056834760	98.9091	96.4279	0.06	40.2402
X-M1_L2	8796667500	8758794986	98.9679	96.6297	0.03	40.1824
X-M1_L3	6225724800	6196851376	98.8759	96.3267	0.06	40.3139
X-M2_L1	6636921000	6601675430	98.7575	96.1559	0.03	36.9326
X-M2_L2	6189495300	6153904938	98.7836	96.2508	0.01	37.1033
X-M2_L3	5927756100	5894611634	98.7582	96.132	0.01	37.2159
X-M3_L1	6568419000	6535596700	98.8372	96.257	0.03	38.2032
X-M3_L2	6210395100	6178486046	98.8026	96.2473	0.06	37.5037
X-M3_L3	6075755700	6043517490	98.8481	96.309	0.01	38.0539
X-M4_L1	6735870300	6706380274	98.8567	96.3757	0.03	37.2842
X-M4_L2	6132024300	6105725852	98.8618	96.3318	0.03	37.5435
X-M4_L3	7572736800	7537461280	98.7911	96.0785	0.03	38.1464
X-M5_L1	7149744600	7118908042	98.9687	96.6037	0.03	39.5604
X-M5_L2	6001162200	5969655018	98.8963	96.41	0.06	39.5634
X-M5_L3	7481700000	7439141428	98.8326	96.2165	0.27	39.4748
Mean	6652546420	6.61984e+09	98.8498	96.3168	0.05	38.4881
X：Drone
