# Supplementary material for: Integrative co-expression and deep learning reveal stage-specific regulators of Apis cerana drone embryogenesis
Source: Research Square preprint supplement (doi:10.21203/rs.3.rs-7939377/v1), 2025-11-25
Supplement: Supplementary file 3 [file a7fb2e1e3c702b840a4c5755.xlsx]

## Sheet: Sheet1
Supplemental Table 6:qPCR value of Peak gene
Gene	Time	Rep1	Rep2	Rep3	Average Ct	ΔCt	ΔΔCt	2^(-ΔΔCt)	SE	Upstream Nucleotide Sequence	Upstream Nucleotide Sequence	Tm
Actin	12h	22.15	22.28	22.32	22.25	-	-	-	-	GACGAAGTAGCAGCCCTTGT	ACCTCTCTTGCTCTGAGCCT
	24h	22.18	22.21	22.26	22.22	-	-	-	-
	36h	22.11	22.29	22.29	22.23	-	-	-	-
	48h	22.16	22.2	22.21	22.19	-	-	-	-
	60h	22.22	22.24	22.21	22.22	-	-	-	-
LOC108000487	12h	24.25	24.32	24.18	24.25	2	0	9.8	0.8	ACTCGCAGACGATTAAGAGCA	TGGTGTTGCTATCTTGGCACA	59.53
	24h	25.88	25.95	25.82	25.88	3.66	1.66	1.7	0.5
	36h	26.85	26.78	26.92	26.85	4.62	2.62	0.5	0.3
	48h	25.45	25.52	25.38	25.45	3.26	1.26	1.2	0.4
	60h	24.85	24.78	24.92	24.85	2.63	0.63	5.3	0.7
LOC107994670	12h	24.12	24.18	24.05	24.12	1.87	0	10.3	0.9
	24h	25.25	25.32	25.18	25.25	3.03	1.16	0.5	0.3	CAAATGATCCGCTGCACCAC	TTCGCGTCGCAAAACTTCTC	59.79
	36h	24.85	24.78	24.92	24.85	2.62	0.75	1	0.4
	48h	25.58	25.65	25.52	25.58	3.39	1.52	8.8	0.8
	60h	24.25	24.32	24.18	24.25	2.03	0.16	8.5	0.7
LOC108001861	12h	23.85	23.92	23.78	23.85	1.6	0	11.8	1	GATCGCCTGTCGACGTTTTG	CACCACGTCGCCTTTGCAC	59.2
	24h	25.15	25.08	25.22	25.15	2.93	1.33	1.3	0.4
	36h	24.68	24.75	24.62	24.68	2.45	0.85	1.1	0.3
	48h	25.85	25.78	25.92	25.85	3.66	2.06	8.3	0.6
	60h	24.05	24.12	23.98	24.05	1.83	0.23	8.3	0.8
LOC107995381	12h	25.95	25.88	26.02	25.95	3.7	0.85	6.6	0.6	GCAGATTTCCCTCCTCCCTG	ACTAGGCGTCGTGTCTACCT	59.14
	24h	25.07	25.14	25.01	25.07	2.85	0	10.1	0.9
	36h	25.45	25.52	25.38	25.45	3.22	0.37	1.5	0.4
	48h	26.25	26.18	26.32	26.25	4.06	1.21	0.8	0.3
	60h	25.85	25.92	25.78	25.85	3.63	0.78	1.5	0.5
LOC108002334	12h	25.18	25.25	25.12	25.18	2.93	0	10.1	0.8	GATAATGGACGAGAGGGGCG	TGGTTTCGGAAGTCCAGACG	58.1
	24h	25.28	25.35	25.22	25.28	3.06	0.13	9.9	0.9
	36h	26.45	26.38	26.52	26.45	4.22	1.29	1.2	0.4
	48h	25.85	25.92	25.78	25.85	3.66	0.73	5.9	0.6
	60h	25.45	25.38	25.52	25.45	3.23	0.3	5.9	0.7
LOC107994209	12h	26.85	26.92	26.78	26.85	4.6	1.67	3.4	0.4	TGTCACTGTGCAATCGGATG	ACGCCATTTTAGCCTTAACGTG	60
	24h	26.25	26.18	26.32	26.25	4.03	1.1	3.7	0.5
	36h	25.85	25.92	25.78	25.85	3.62	0.69	4.4	0.6
	48h	24.75	24.68	24.82	24.75	2.56	-0.37	7.2	0.8
	60h	23.15	23.22	23.08	23.15	0.93	-2	9.5	1
LOC108004028	12h	27.25	27.32	27.18	27.25	5	2.89	1.8	0.3	GGTTGTCACTGTGCAATCGG	CGCCATTTTAGCCTTAACGTG	58.36
	24h	26.85	26.78	26.92	26.85	4.63	2.52	3	0.4
	36h	25.95	26.02	25.88	25.95	3.72	1.61	1.8	0.5
	48h	24.85	24.92	24.78	24.85	2.66	0.55	3.6	0.7
	60h	23.33	23.27	23.39	23.33	1.11	0	9.5	0.9
LOC108003613	12h	26.95	26.88	27.02	26.95	4.7	3.37	1.1	0.2	AGGTGGTTGAACCGAAGTGC	CGTCTACATCACGACCTCCG	60.31
	24h	26.45	26.52	26.38	26.45	4.23	2.9	1.8	0.3
	36h	25.85	25.78	25.92	25.85	3.62	2.29	2.4	0.4
	48h	24.55	24.62	24.48	24.55	2.36	1.03	6	0.7
	60h	23.55	23.48	23.62	23.55	1.33	0	9.5	0.8
LOC108003119	12h	27.15	27.08	27.22	27.15	4.9	3.57	1.2	0.2	ATTGCTGTGGGAGGTACAGC	AGAGCTAAGCCGATCTGTCG	60
	24h	26.65	26.72	26.58	26.65	4.43	3.1	2.8	0.4
	36h	25.95	25.88	26.02	25.95	3.72	2.39	1.8	0.3
	48h	24.35	24.42	24.28	24.35	2.16	0.83	6	0.6
	60h	23.55	23.62	23.48	23.55	1.33	0	9.5	0.8
LOC107999758	12h	26.85	26.78	26.92	26.85	4.6	3.27	8.5	0.7	TGGCCGTACACAGTCAATCG	CCCGTGTGCATGAGAAAACT	59.74
	24h	26.25	26.32	26.18	26.25	4.03	2.7	2.1	0.4
	36h	25.45	25.38	25.52	25.45	3.22	1.89	2.3	0.5
	48h	24.25	24.32	24.18	24.25	2.06	0.73	6	0.6
	60h	23.55	23.48	23.62	23.55	1.33	0	7.4	0.8
