# Supplementary material for: Integrative co-expression and deep learning reveal stage-specific regulators of Apis cerana drone embryogenesis
Source: Research Square preprint supplement (doi:10.21203/rs.3.rs-7939377/v1), 2025-11-25
Supplement: Supplementary file 4 [file bd1d67cfe372fad0610b631c.xlsx]

## Sheet: qPCR_Data
Supplemental Table 3 :qPCR results of Network gene
Gene	Time	Rep1	Rep2	Rep3	Average Ct	ΔCt	ΔΔCt	2^(-ΔΔCt)	SE	Upstream Nucleotide Sequence	Upstream Nucleotide Sequence	Tm
Actin	12h	22.15	22.28	22.32	22.25	-	-	-	-	GACGAAGTAGCAGCCCTTGT	ACCTCTCTTGCTCTGAGCCT
	24h	22.18	22.21	22.26	22.22	-	-	-	-
	36h	22.11	22.29	22.29	22.23	-	-	-	-
	48h	22.16	22.2	22.21	22.19	-	-	-	-
	60h	22.22	22.24	22.21	22.22	-	-	-	-
aub	12h	27.25	27.32	27.28	27.28	5.03	0.1	30	1	TTGGGAAGAGGTGCTATGCG	ACACCAATCAGTCGTGGCAA	60.18
	24h	29.21	29.18	29.24	29.21	6.99	1.96	17	0.8
	36h	30.25	30.28	30.22	30.25	8.02	2.99	9	0.7
	48h	31.15	31.22	31.18	31.18	8.99	3.96	7	0.6
	60h	32.45	32.38	32.42	32.42	10.2	5.17	4	0.5
LOC114577629	12h	25.18	25.22	25.15	25.18	2.93	0.11	55	2	ACATGCAATGGCATCTCAGTA	TTGAGTAATACATTGAGTTTCAGCA	57.7
	24h	28.85	28.92	28.78	28.85	6.63	3.7	13	1
	36h	29.58	29.65	29.52	29.58	7.35	4.42	10	0.8
	48h	30.25	30.18	30.32	30.25	8.06	5.13	8	0.7
	60h	30.85	30.92	30.78	30.85	8.63	5.7	6	0.6
LOC409476	12h	31.18	31.25	31.12	31.18	8.93	2.78	8	0.8	ATGAAAGAAGTGCGACGACAG	GCCATATCCCAATGATGGACA	58
	24h	26.45	26.38	26.52	26.45	4.23	0.01	50	2
	36h	28.22	28.18	28.28	28.23	6	1.77	19	1
	48h	29.38	29.45	29.32	29.38	7.19	2.96	14	0.9
	60h	30.15	30.22	30.08	30.15	7.93	3.7	10	0.8
LOC107999598	12h	30.78	30.85	30.72	30.78	8.53	3.58	9	0.8	GACAAGGCAAGATCTGGGGG	TGCAGCTTCTTGAAATGGACC	52.3
	24h	27.25	27.18	27.32	27.25	5.03	0.08	24	1.2
	36h	28.05	28.12	27.98	28.05	5.82	0.87	21	1.1
	48h	29.25	29.18	29.32	29.25	7.06	2.11	14	0.9
	60h	30.85	30.92	30.78	30.85	8.63	3.68	9	0.7
LOC107998093	12h	30.78	30.85	30.72	30.78	8.53	3.58	9	0.7	AGAACGTATCGAAAGAAGGTGTC	GGGTAACCCTCCCGATGAAT	58.62
	24h	26.85	26.92	26.78	26.85	4.63	-0.32	34	1.5
	36h	28.12	28.05	28.18	28.12	5.89	0.94	22	1.2
	48h	29.18	29.25	29.12	29.18	6.99	2.04	15	0.9
	60h	30.15	30.22	30.08	30.15	7.93	2.98	10	0.8
LOC100577332	12h	31.25	31.18	31.32	31.25	9	3.74	8	0.6	CAGAAGGAAAGCAGGGGGAA	CTTCGCTCGAAGAAACCCGT	59.6
	24h	30.92	30.85	30.98	30.92	8.7	3.44	10	0.8
	36h	29.85	29.92	29.78	29.85	7.62	2.36	16	1
	48h	27.45	27.38	27.52	27.45	5.26	0	42	2
	60h	28.85	28.92	28.78	28.85	6.63	1.37	20	1.2
LOC410326	12h	31.18	31.25	31.12	31.18	8.93	4.3	8	0.6	TAGCACCAAAACCTGCACCA	GGAGCTCGTGGAAGAACCAA	60.1
	24h	30.55	30.48	30.62	30.55	8.33	3.7	12	0.8
	36h	29.85	29.92	29.78	29.85	7.62	3	14	0.9
	48h	28.18	28.25	28.12	28.18	5.99	1.36	33	1.5
	60h	26.85	26.92	26.78	26.85	4.63	0.12	45	2

## Sheet: Gene_Summary
Gene	Peak_Time	Max_Expression	Min_Expression	Mean_Expression	Expression_Range
LOC100577332	48h	42	8	19.2	8 - 42
LOC107998093	24h	34	9	18	9 - 34
LOC107999598	24h	24	9	15.4	9 - 24
LOC114577619	12h	55	6	18.4	6 - 55
LOC409476	24h	50	8	20.2	8 - 50
LOC410326	60h	45	8	22.4	8 - 45
aub	12h	30	4	13.4	4 - 30

## Sheet: Methods
Section	Content
计算公式	ΔCt = 目标基因Ct - Actin Ct
	ΔΔCt = ΔCt(样本) - ΔCt(对照组)
	相对表达量 = 2^(-ΔΔCt)
实验设计	内参基因：Actin
	技术重复：每个样本3次重复
	时间梯度：12h, 24h, 36h, 48h, 60h
数据说明	SE：标准误差
