# Supplementary material for: Integrative co-expression and deep learning reveal stage-specific regulators of Apis cerana drone embryogenesis
Source: Research Square preprint supplement (doi:10.21203/rs.3.rs-7939377/v1), 2025-11-25
Supplement: Supplementary file 5 [file ced59b9aed85ad04ff0c2f4b.xlsx]

## Sheet: Sheet1
Supplemental Table 2: fastq mapping Ratio
Sample	Total	Unmapped (%)	Uniquely mapped (%)	Multiple mapped (%)	Total mapped (%)
X-M1_L1	42274803	2	92	2	97
X-M1_L2	41307039	2	93	1	97
X-M1_L3	59855808	2	92	2	97
X-M2_L1	45937579	5	86	3	94
X-M2_L2	42784220	5	87	3	94
X-M2_L3	40853569	4	88	3	95
X-M3_L1	46004255	3	89	2	96
X-M3_L2	42980671	3	89	2	96
X-M3_L3	42516393	3	89	2	96
X-M4_L1	46982852	3	89	2	96
X-M4_L2	42741773	3	89	2	96
X-M4_L3	53270455	2	89	1	97
X-M5_L1	48728777	2	92	1	97
X-M5_L2	40853720	2	92	1	97
X-M5_L3	50940831	2	92	1	97
