# Supplementary figures and images for: Integrative co-expression and deep learning reveal stage-specific regulators of Apis cerana drone embryogenesis
Source: Research Square preprint supplement (doi:10.21203/rs.3.rs-7939377/v1), 2025-11-25

**a**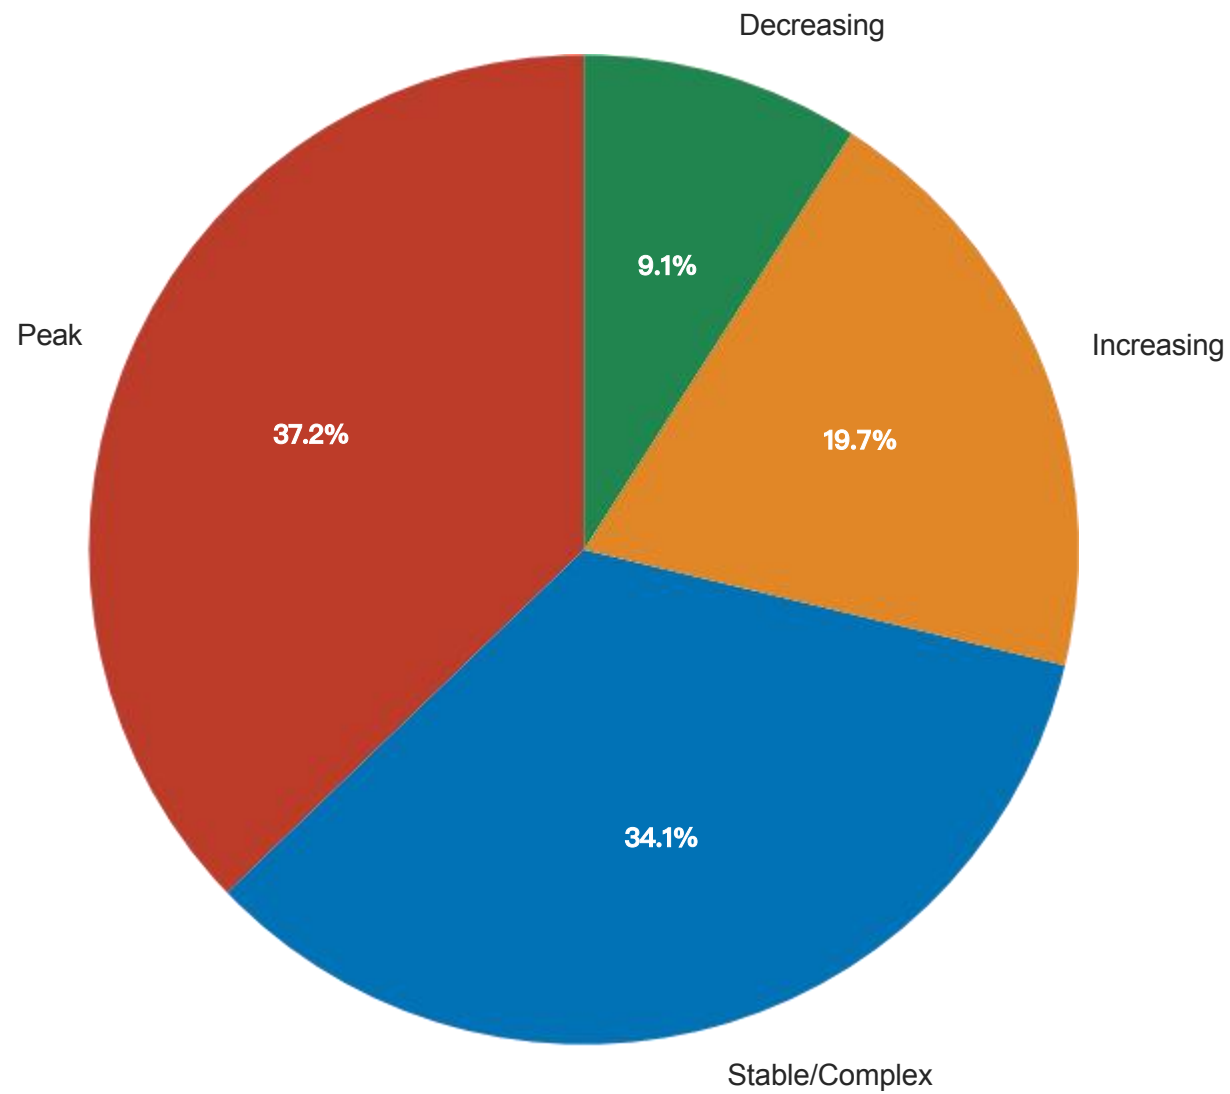**b**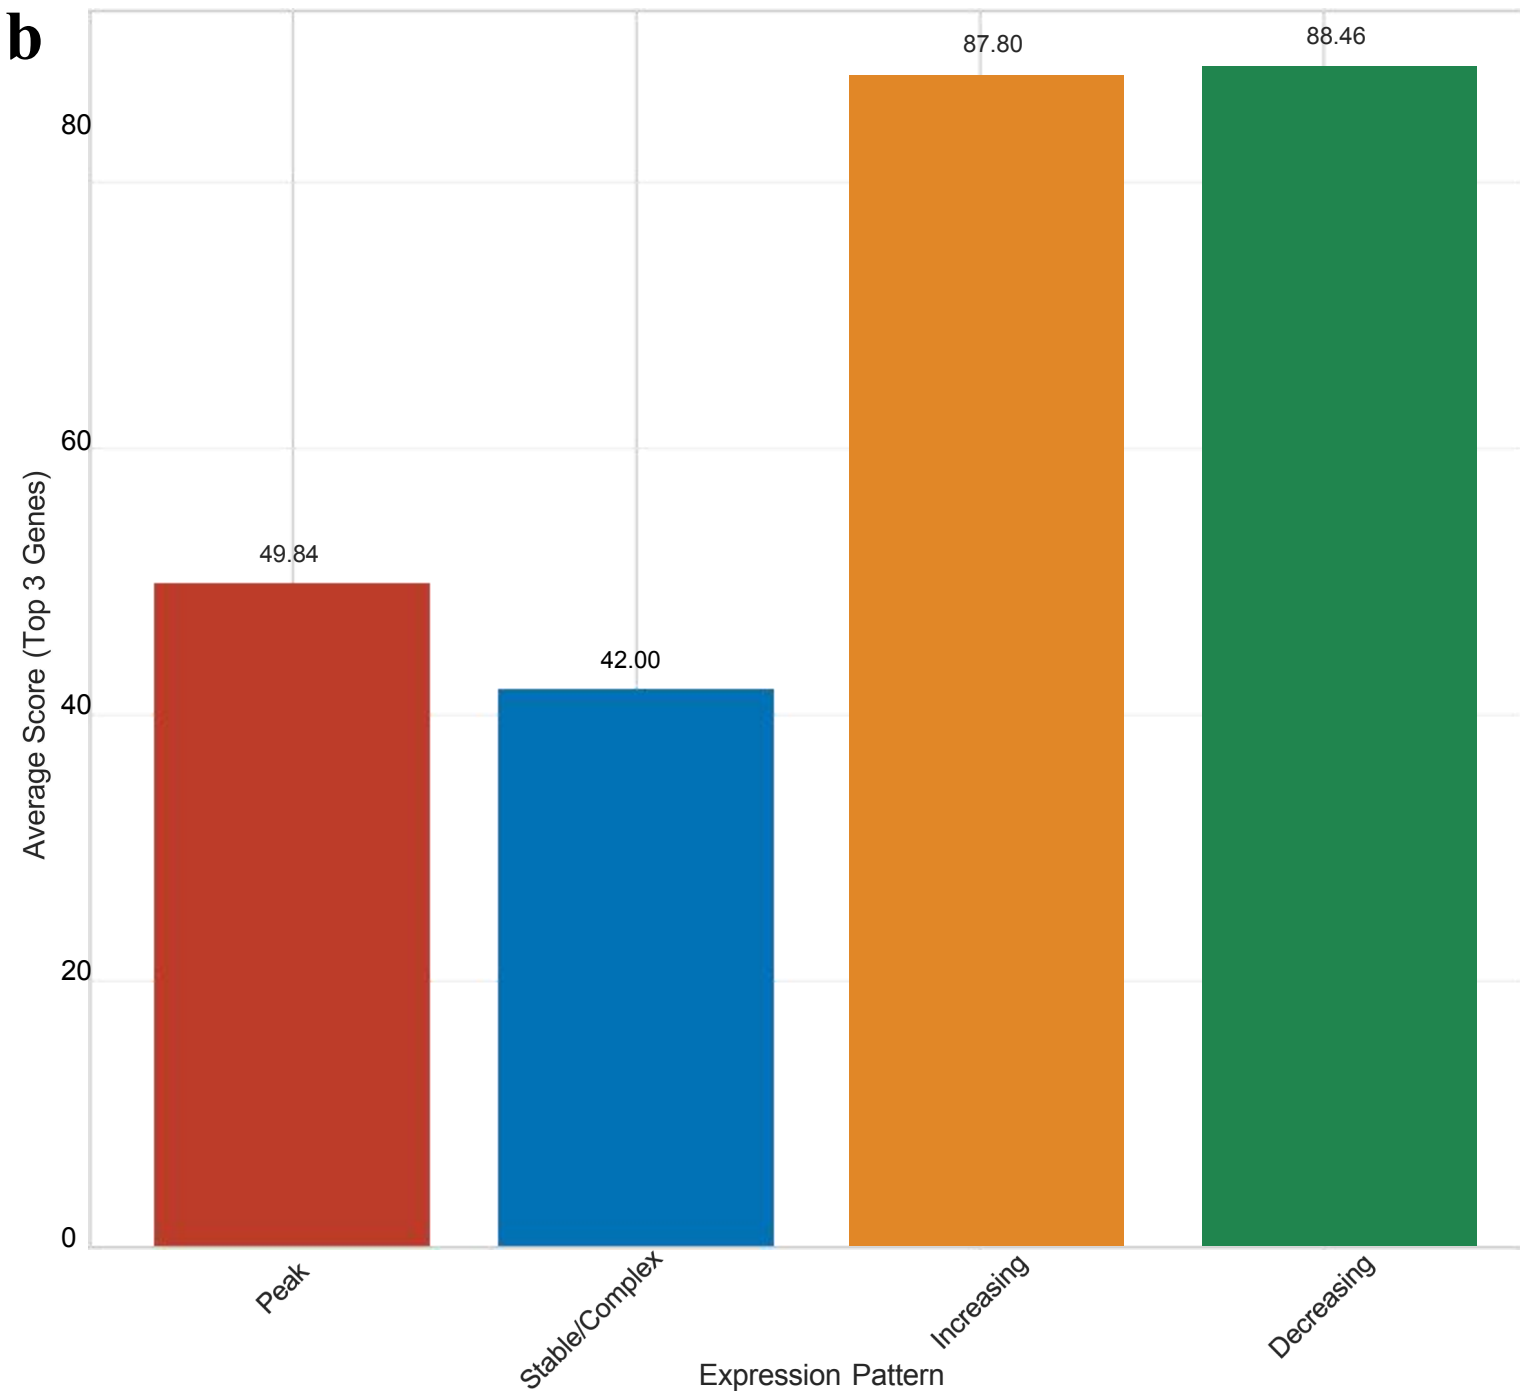

Supplement: Supplementary file 1 [file e10c297dda932e325c3fc9ee.pdf]
